# Supplementary material for: High-Throughput Mutation Profiling Changes before and 3 Weeks after Chemotherapy in Newly Diagnosed Breast Cancer Patients
Source: PubMed Central journal article supplement (PMC4667877; doi:10.1371/journal.pone.0142466), 2015-12-02
Supplement: pone.0142466.s003.pdf [file pone.0142466.s003.pdf]

**S1 Table. OncoCarta v1.0 : 238 mutations from 19 oncogenes**

Oncogene (number of mutations)

|                  |                  |                  |                    |
|------------------|------------------|------------------|--------------------|
| <i>ABL1</i> (14) | <i>EGFR</i> (55) | <i>HRAS</i> (10) | <i>NRAS</i> (19)   |
| <i>AKT1</i> (7)  | <i>ERBB2</i> (7) | <i>JAK2</i> (1)  | <i>PDGFRA</i> (11) |
| <i>AKT 2</i> (2) | <i>FGFR1</i> (2) | <i>KIT</i> (32)  | <i>PIK3CA</i> (14) |
| <i>BRAF</i> (25) | <i>FGFR3</i> (7) | <i>KRAS</i> (16) | <i>RET</i> (6)     |
| <i>CDK-4</i> (2) | <i>FLT3</i> (3)  | <i>MET</i> (5)   |                    |
